# Supplementary material for: Electron interactions with the heteronuclear carbonyl precursor H2FeRu3(CO)13 and comparison with HFeCo3(CO)12: from fundamental gas phase and surface science studies to focused electron beam induced deposition
Source: publisher site journal article supplement (doi:10.3762/bjnano.9.53), 2018-02-14
Supplement: Additional file 1 [file 2190-4286-9-53-S1.pdf]

## Supporting Information for

# **Electron Interactions with the heteronuclear carbonyl precursor ( $\text{H}_2\text{FeRu}_3(\text{CO})_{13}$ ) and comparison with $\text{HFeCo}_3(\text{CO})_{12}$ : from fundamental gas phase and surface science studies to focused electron beam induced deposition**

Ragesh Kumar T P<sup>1</sup>, Paul Weirich<sup>2</sup>, Lukas Hrachowina<sup>3</sup>, Marc Hanefeld<sup>2</sup>, Ragnar Bjornsson<sup>1</sup>, Helgi Rafn Hrodmarsson<sup>1</sup>, Sven Barth<sup>3</sup>, D. Howard Fairbrother<sup>4</sup>, Michael Huth<sup>2</sup>, and Oddur Ingólfsson\*<sup>1</sup>

### Address

<sup>1</sup>Science Institute and Department of Chemistry, University of Iceland, Reykjavík, Iceland

<sup>2</sup>Physikalisches Institut, Max-von-Laue-Str. 1, Goethe-Universität, 60438 Frankfurt am Main, Germany

<sup>3</sup>Institute of Materials Chemistry, TU Wien, 1060 Vienna, Austria

<sup>4</sup>Department of Chemistry, Johns Hopkins University, Baltimore, Maryland, USA

Email: [odduring@hi.is](mailto:odduring@hi.is)

\* Oddur Ingólfsson

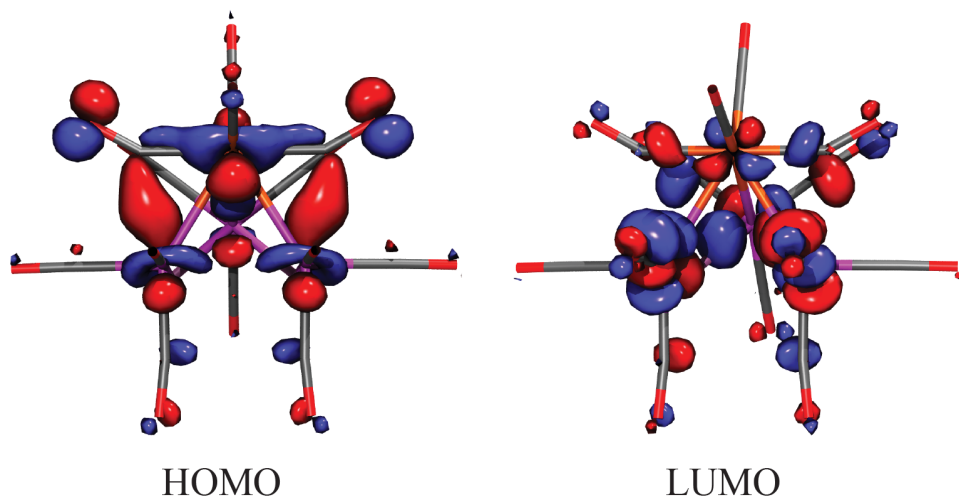

Figure S1: The highest occupied molecular orbital (HOMO) and lowest unoccupied molecular orbital (LUMO) of  $\text{H}_2\text{FeRu}_3(\text{CO})_{13}$ .

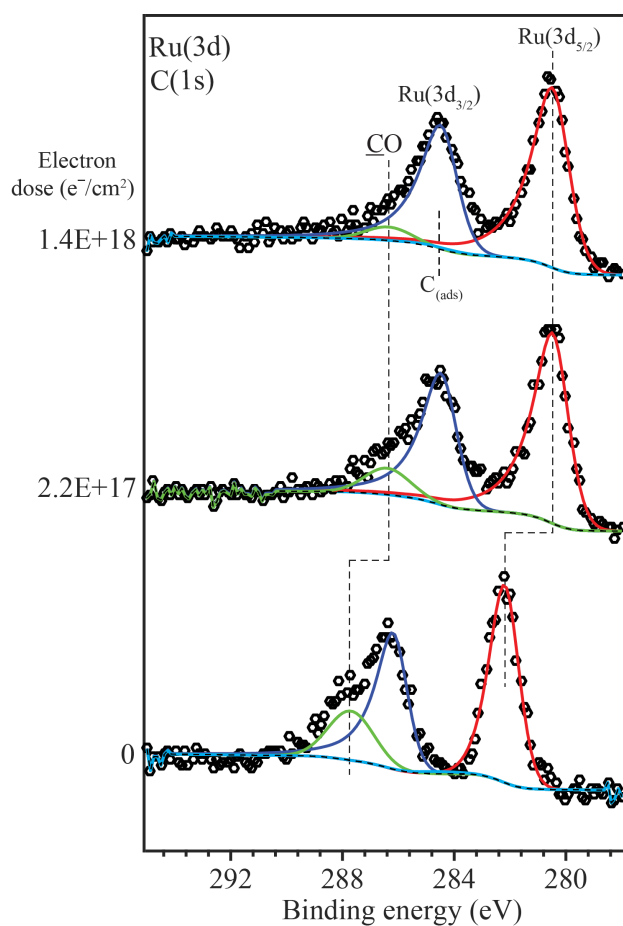

Figure S2: Fitting of Ru(3d)/C(1s) XPS region prior to electron irradiation and with electron dose of  $2.2 \times 10^{17} \text{ e}^-/\text{cm}^2$  and  $1.4 \times 10^{18} \text{ e}^-/\text{cm}^2$ , XPS regions are fitted using CASA XPS program.

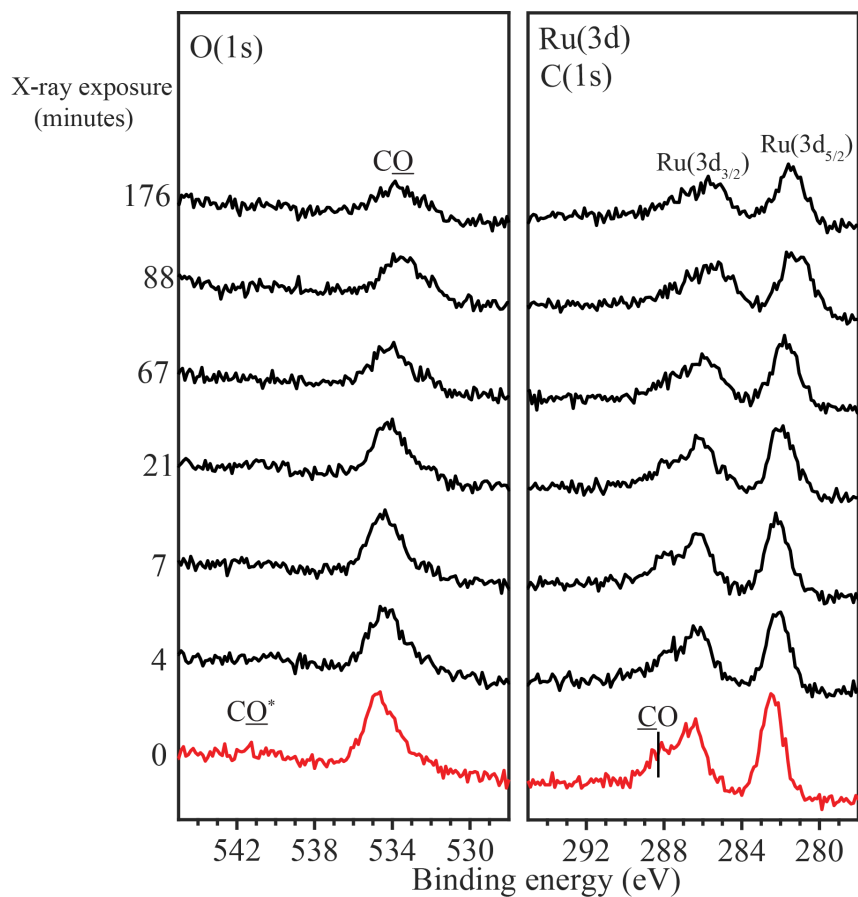

Figure S3: Evolution of the O(1s) and the Ru(3d)/C(1s) XPS regions of  $\text{H}_2\text{FeRu}_3(\text{CO})_{13}$  films exposed to X-rays (Mg  $K\alpha$  1253.6 eV).

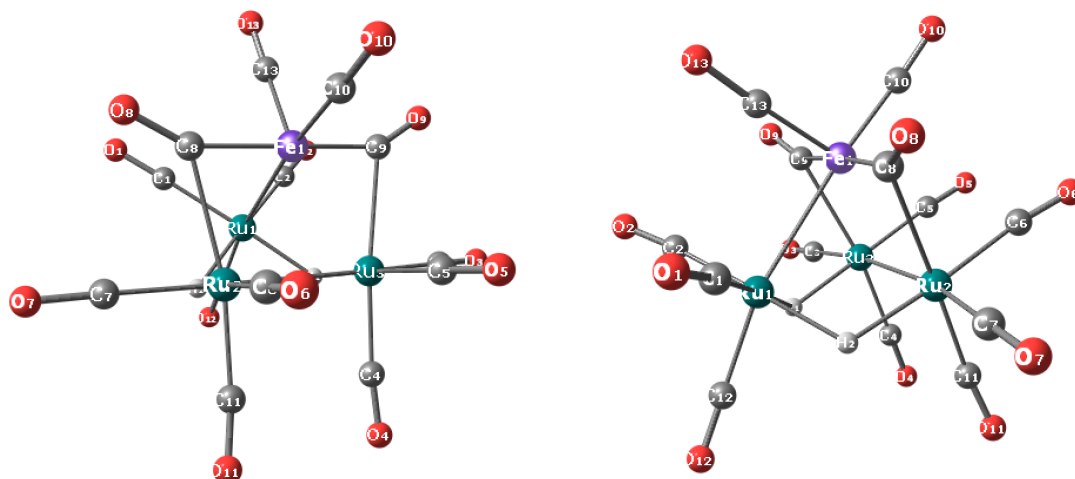

Figure S4: BP86/def2-TZVP optimized neutral and anionic ground state geometry of  $\text{H}_2\text{FeRu}_3(\text{CO})_{13}$  with associated numbers, bond lengths and bond angles given in Table S2 are tabulated using this number schemes.

Table S1: BP86/def2-TZVP optimized Cartesian coordinates of  $\text{H}_2\text{FeRu}_3(\text{CO})_{13}$  neutral molecule and its ground state anion

Neutral:

|    |              |             |              |
|----|--------------|-------------|--------------|
| Ru | -0.273193000 | 5.357425000 | 4.114643000  |
| Ru | 0.379204000  | 2.514531000 | 3.795529000  |
| Ru | 0.056881000  | 4.130721000 | 1.466407000  |
| Fe | 2.112780000  | 4.468044000 | 3.162560000  |
| O  | 0.817848000  | 5.731427000 | 6.942025000  |
| O  | 0.329528000  | 8.235627000 | 3.294264000  |
| O  | -0.565022000 | 6.156797000 | -0.739957000 |
| O  | -2.551897000 | 2.736814000 | 0.760548000  |
| O  | 1.725644000  | 2.276628000 | -0.284319000 |
| O  | 2.098071000  | 0.428072000 | 2.387614000  |
| O  | 0.427708000  | 1.143234000 | 6.529039000  |
| O  | 2.849179000  | 3.214998000 | 5.705331000  |
| O  | 2.211212000  | 6.453180000 | 1.011624000  |
| O  | 4.493427000  | 3.218953000 | 1.983327000  |
| C  | 0.426399000  | 5.592590000 | 5.868353000  |
| C  | 0.124290000  | 7.147074000 | 3.607514000  |
| C  | -0.323176000 | 5.403616000 | 0.094680000  |
| C  | -1.558597000 | 3.216472000 | 1.097338000  |
| C  | 1.100155000  | 2.971838000 | 0.388485000  |
| C  | 1.452482000  | 1.228010000 | 2.907535000  |
| C  | 0.419257000  | 1.667116000 | 5.505328000  |
| C  | 2.283264000  | 3.481909000 | 4.714518000  |
| C  | 1.873597000  | 5.565151000 | 1.697569000  |
| C  | 3.544551000  | 3.695420000 | 2.437124000  |
| H  | -0.999543000 | 5.143821000 | 2.516039000  |
| C  | -1.236037000 | 1.623323000 | 3.371031000  |
| O  | -2.194933000 | 0.999944000 | 3.222602000  |
| C  | -2.094949000 | 5.668002000 | 4.575462000  |
| O  | -3.193516000 | 5.871444000 | 4.855827000  |
| O  | 3.511361000  | 6.661343000 | 4.490378000  |

|   |              |             |             |
|---|--------------|-------------|-------------|
| C | 2.947575000  | 5.799043000 | 3.969411000 |
| H | -0.728665000 | 3.705992000 | 4.566086000 |

Anion:

|    |              |             |              |
|----|--------------|-------------|--------------|
| Ru | -0.222821000 | 5.419618000 | 4.149819000  |
| Ru | 0.356112000  | 2.460484000 | 3.790072000  |
| Ru | 0.031123000  | 4.095071000 | 1.418717000  |
| Fe | 2.156607000  | 4.475851000 | 3.170896000  |
| O  | 0.771097000  | 5.783579000 | 7.022698000  |
| O  | 0.294536000  | 8.326487000 | 3.347596000  |
| O  | -0.606680000 | 6.097998000 | -0.784456000 |
| O  | -2.619125000 | 2.764134000 | 0.760225000  |
| O  | 1.701542000  | 2.217086000 | -0.339679000 |
| O  | 2.114051000  | 0.390934000 | 2.363532000  |
| O  | 0.380511000  | 1.080449000 | 6.504744000  |
| O  | 2.836836000  | 3.165799000 | 5.707213000  |
| O  | 2.205362000  | 6.404655000 | 0.959508000  |
| O  | 4.600544000  | 3.316492000 | 2.045099000  |
| C  | 0.438892000  | 5.578622000 | 5.930468000  |
| C  | 0.131785000  | 7.204108000 | 3.590342000  |
| C  | -0.356383000 | 5.349321000 | 0.063457000  |
| C  | -1.615504000 | 3.237435000 | 1.102858000  |
| C  | 1.138101000  | 2.936095000 | 0.375394000  |
| C  | 1.505168000  | 1.230410000 | 2.882989000  |
| C  | 0.378740000  | 1.619424000 | 5.479351000  |
| C  | 2.291746000  | 3.463364000 | 4.708534000  |
| C  | 1.882290000  | 5.528582000 | 1.674939000  |
| C  | 3.612502000  | 3.748941000 | 2.475313000  |
| H  | -0.927385000 | 5.125154000 | 2.516233000  |
| C  | -1.280720000 | 1.624786000 | 3.384596000  |
| O  | -2.244728000 | 0.995796000 | 3.231245000  |
| C  | -2.025716000 | 5.715887000 | 4.588092000  |
| O  | -3.139425000 | 5.900269000 | 4.859730000  |
| O  | 3.449003000  | 6.709217000 | 4.517169000  |
| C  | 2.902071000  | 5.829846000 | 3.990880000  |
| H  | -0.675250000 | 3.712673000 | 4.526340000  |

**Table S2:** calculated bond lengths and bond angles of the optimized ground state  $\text{H}_2\text{FeRu}_3(\text{CO})_{13}$  neutral molecule and anion. Geometries are optimized at the BP86/def2-TZVP level of theory. Numbers associated with each atom can be found in Figure S4 here above.

| Bond length (Å) | Neutral (calc.) | Anion (calc.) |
|-----------------|-----------------|---------------|
| Fe1-C8          | 1.84665         | 1.846         |
| Fe1-C9          | 1.84582         | 1.8497        |
| Fe1-C10         | 1.78134         | 1.76971       |
| Fe1-C13         | 1.7662          | 1.74968       |
| Fe1-Ru1         | 2.71852         | 2.74056       |
| Fe1-Ru2         | 2.68741         | 2.77252       |
| Fe1-Ru3         | 2.68653         | 2.78079       |
| Ru1-C1          | 1.90269         | 1.90627       |
| Ru1-C2          | 1.90211         | 1.90346       |
| Ru1-C12         | 1.90463         | 1.87891       |
| Ru1-H1          | 1.76883         | 1.80325       |
| Ru1-H2          | 1.77158         | 1.80558       |
| Ru1-Ru2         | 2.9342          | 3.03662       |
| Ru1-Ru3         | 2.93716         | 3.04595       |
| Ru2-C6          | 1.89621         | 1.91212       |
| Ru2-C7          | 1.9087          | 1.88721       |
| Ru2-C8          | 2.32504         | 2.36559       |
| Ru2-C11         | 1.893           | 1.88203       |
| Ru2-H2          | 1.8002          | 1.78151       |
| Ru2-Ru3         | 2.8532          | 2.89842       |
| Ru3-C3          | 1.90954         | 1.88681       |
| Ru3-C4          | 1.89257         | 1.88326       |
| Ru3-C5          | 1.89561         | 1.91237       |
| Ru3-C9          | 2.32626         | 2.3553        |
| Ru3-H1          | 1.80115         | 1.78447       |

| Bond angle (degree) | Neutral (calc.) | Anion (calc.) |
|---------------------|-----------------|---------------|
| Fe1-C8-Ru2          | 79.304          | 81.328        |
| Fe1-C9-Ru3          | 79.255          | 81.845        |
| Fe1-C8-O8           | 151.26          | 151.649       |
| Fe1-C9-O9           | 151.367         | 151.048       |
| Fe1-C10-O10         | 178.214         | 176.982       |
| Fe1-C13-O13         | 178.972         | 177.117       |
| C8-Fe1-C9           | 175.131         | 175.326       |
| C10-Fe1-C13         | 97.643          | 98.717        |
| C8-Fe1-Ru2          | 58.226          | 57.509        |
| C9-Fe1-Ru3          | 58.29           | 56.974        |

---

|             |         |         |
|-------------|---------|---------|
| C10-Fe1-Ru2 | 107.405 | 108.872 |
| C10-Fe1-Ru3 | 107.669 | 108.96  |
| C13-Fe1-Ru1 | 90.475  | 86.332  |
| C10-Fe1-C9  | 92.22   | 92.172  |
| C10-Fe1-C8  | 92.088  | 92.4    |
| C9-Fe1-C13  | 88.619  | 90.102  |
| Fe1-Ru1-C1  | 92.323  | 93.497  |
| Fe1-Ru1-C2  | 91.778  | 93.217  |
| Fe1-Ru1-C12 | 167.842 | 166.102 |
| Fe1-Ru1-H1  | 90.251  | 87.674  |
| Fe1-Ru1-H2  | 90.569  | 88.079  |
| Fe1-Ru1-Ru3 | 56.562  | 57.152  |
| Fe1-Ru1-Ru2 | 56.619  | 57.083  |
| Fe1-Ru2-C7  | 121.345 | 121.069 |
| Fe1-Ru2-C6  | 91.018  | 88.363  |
| Fe1-Ru3-C3  | 121.476 | 121.235 |
| Fe1-Ru3-H1  | 90.59   | 86.789  |
| Fe1-Ru2-H2  | 90.957  | 87.554  |
| Ru1-Ru2-Ru3 | 60.977  | 61.705  |
| Ru1-H1-Ru3  | 110.717 | 116.203 |
| Ru1-H2-Ru2  | 110.467 | 115.673 |
| C1-Ru1-C2   | 93.016  | 97.567  |
| C1-Ru1-C12  | 96.231  | 95.857  |
| Ru1-C1-O1   | 178.287 | 173.604 |
| Ru1-C2-O2   | 178.193 | 174.214 |
| Ru1-C12-O12 | 179.203 | 179.922 |
| Ru2-Ru3-Ru1 | 60.873  | 61.38   |
| C6-Ru2-C7   | 96.108  | 97.512  |
| C6-Ru2-C8   | 90.221  | 88.006  |
| C6-Ru2-C11  | 93.355  | 97.746  |
| C7-Ru2-C8   | 79.25   | 80.304  |
| C7-Ru2-C11  | 90.559  | 90.309  |
| C6-Ru2-Ru3  | 93.783  | 92.41   |
| C7-Ru2-Ru1  | 109.719 | 109.301 |
| C2-Ru1-Ru3  | 97.417  | 97.389  |
| C1-Ru1-Ru2  | 97.946  | 97.225  |
| Ru2-C6-O6   | 178.628 | 173.476 |
| Ru2-C7-O7   | 178.926 | 178.605 |
| Ru2C8-O8    | 129.414 | 126.992 |
| Ru2-C11-O11 | 173.104 | 172.297 |
| Ru1-Fe1-Ru2 | 65.742  | 66.841  |
| Ru1-Fe1-Ru3 | 65.829  | 66.958  |
| Ru2-Fe1-Ru3 | 64.137  | 62.923  |

---

|            |         |         |
|------------|---------|---------|
| C3-Ru3-C4  | 90.69   | 90.154  |
| C3-Ru3-C5  | 96.233  | 97.463  |
| C3-Ru3-C9  | 79.384  | 80.501  |
| C3-Ru3-H1  | 85.811  | 87.004  |
| C4-Ru3-C9  | 169.696 | 169.301 |
| C5-Ru3-C9  | 90.21   | 88.467  |
| C5-Ru3-C4  | 93.645  | 97.968  |
| C5-Ru3-Ru2 | 93.194  | 92.274  |
| C3-Ru3-Ru1 | 110.299 | 109.746 |
| Ru3-C3-O3  | 178.978 | 178.548 |
| Ru3-C4-O4  | 173.221 | 172.179 |
| Ru3-C5-O5  | 178.923 | 173.245 |
| Ru3-C9-O9  | 129.356 | 127.084 |

**Table S3:** calculated threshold ( $E_{th}$ ) values for the formation of negative ions  $[M - Fe(CO)_2]^-$ ,  $[M - Fe(CO)_3]^-$ ,  $[M - Fe(CO)_4]^-$ , and  $[M - Fe(CO)_4 - n CO]^-$  ( $n = 1$  to  $7$ ) through dissociative electron attachment to  $H_2FeRu_3(CO)_{13}$ , these threshold values are compared to corresponding isobaric fragments  $[M - nCO]^-$ , where  $n = 4$  to  $13$ . Threshold values are derived from single point energy calculation at the PBE0/ma-def2-TZVP level of theory, while the geometry optimizations are carried out at the BP86/def2-TZVP level of theory. ZPE corrections and thermal corrections are included in the calculated threshold values. Appearance energy (AE) values are estimated from the rising part of corresponding ion yield curves. All values are in eV.

| Fragment       | $E_{th}$ at PBE0/ma-def2-TZVP | Fragment                 | $E_{th}$ at PBE0/ma-def2-TZVP | AE       |
|----------------|-------------------------------|--------------------------|-------------------------------|----------|
| $[M - 4CO]^-$  | 1.69                          | $[M - Fe(CO)_2]^-$       | 1.20                          | 0        |
| $[M - 5CO]^-$  | 3.42                          | $[M - Fe(CO)_3]^-$       | -0.14                         | 0        |
| $[M - 6CO]^-$  | 5.02                          | $[M - Fe(CO)_4]^-$       | -0.75                         | 0.5±0.1  |
| $[M - 7CO]^-$  | 7.66                          | $[M - Fe(CO)_4 - CO]^-$  | 0.75                          | 1.8±0.2  |
| $[M - 8CO]^-$  | 8.56                          | $[M - Fe(CO)_4 - 2CO]^-$ | 2.82                          | 3.2±0.2  |
| $[M - 9CO]^-$  | 12.62                         | $[M - Fe(CO)_4 - 3CO]^-$ | 3.87                          | 4.4±0.2  |
| $[M - 10CO]^-$ | 16.30                         | $[M - Fe(CO)_4 - 4CO]^-$ | 6.37                          | 7.4±0.2  |
| $[M - 11CO]^-$ | 15.94                         | $[M - Fe(CO)_4 - 5CO]^-$ | 8.59                          | 9±0.2    |
| $[M - 12CO]^-$ | 19.00                         | $[M - Fe(CO)_4 - 6CO]^-$ | 11.00                         | 11.9±0.2 |
| $[M - 13CO]^-$ | 22.82                         | $[M - Fe(CO)_4 - 7CO]^-$ | 13.70                         | 14.6±0.2 |



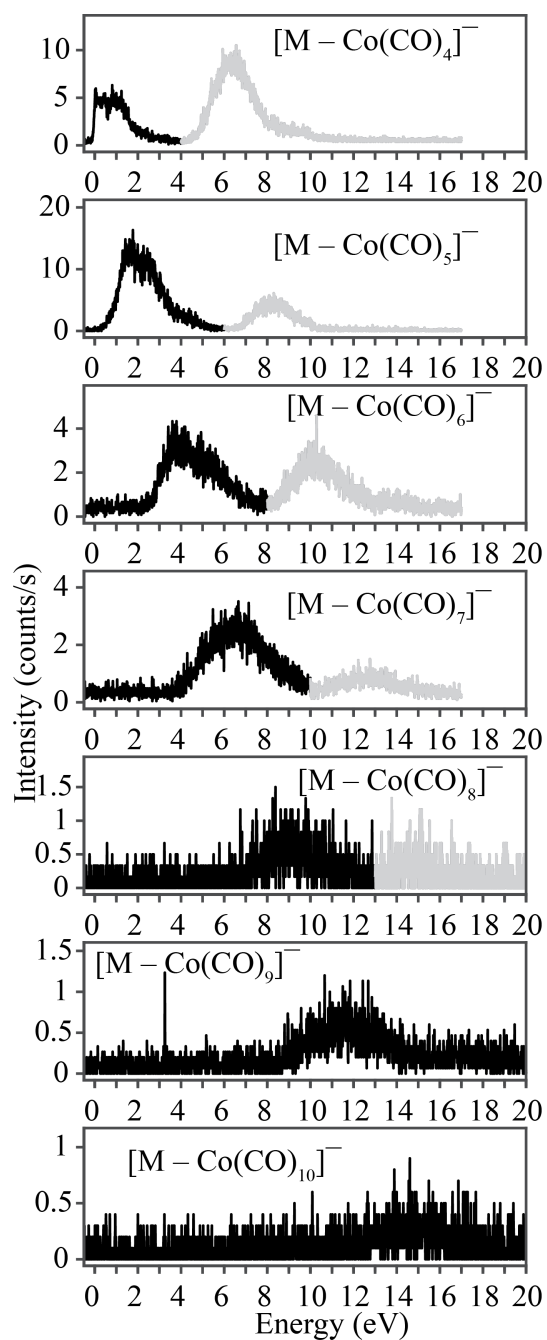

Figure S5. Negative ion yield curve of  $[M - \text{Co}(\text{CO})_n]^-$  ( $n = 4$  to  $10$ ) produced through dissociative electron attachment to  $\text{HFeCo}_3(\text{CO})_{12}$ . These spectra are recorded with low mass resolution to attain sufficient signal and the grey shaded contributions are attributed to spill-over from  $[M - (\text{CO})_{n+2}]^-$ .
